# Supplementary material for: Effect of Dural-Puncture Epidural vs Standard Epidural for Epidural Extension on Onset Time of Surgical Anesthesia in Elective Cesarean Delivery: A Randomized Clinical Trial
Source: PubMed Central journal article supplement (PMC10394571; doi:10.1001/jamanetworkopen.2023.26710), 2023-08-01
Supplement: jamanetwopen-e2326710-s001.pdf [file jamanetwopen-e2326710-s001.pdf]

Title: Dural Puncture Epidural versus Epidural anesthesia for cesarean delivery: A randomized, double-blind study (#228768)  
PI: Nadir Sharawi, MD  
Site: University of Arkansas for Medical Sciences

1  
2 **Study Title:** Dural Puncture Epidural versus Epidural anesthesia for  
3 cesarean delivery: A randomized, double-blind study  
4

5 **Principal Investigator:** Nadir Sharawi, MD  
6 University of Arkansas for Medical Sciences  
7 4301 W. Markham Street, Slot # 515  
8 Little Rock, AR 72205  
9 Telephone: (501) 319-2622  
10 Email: [NElsharawi@uams.edu](mailto:NElsharawi@uams.edu)  
11

12 **Sub-Investigator (s):**  
13 Jill Mhyre, MD  
14 University of Arkansas for Medical Sciences  
15 4301 W. Markham Street, Slot # 515  
16 Little Rock, AR 72205  
17 Telephone: (501) 554-4943  
18 Email: [JMMhyre@uams.edu](mailto:JMMhyre@uams.edu)  
19

20 Matthew Williams, MD  
21 University of Arkansas for Medical Sciences  
22 4301 W. Markham Street, Slot # 515  
23 Little Rock, AR 72205  
24 Email: [MWilliams@uams.edu](mailto:MWilliams@uams.edu)  
25

26 **Study location:** University of Arkansas for Medical Sciences  
27 4301 W. Markham Street, Slot # 515  
28 Little Rock, AR 72205  
29

Title: Dural Puncture Epidural versus Epidural anesthesia for cesarean delivery: A randomized, double-blind study (#228768)  
PI: Nadir Sharawi, MD  
Site: University of Arkansas for Medical Sciences

## 30 **Table of Contents**

|    |                                                        |    |
|----|--------------------------------------------------------|----|
| 31 |                                                        |    |
| 32 | Table of Contents .....                                | 2  |
| 33 | Abbreviations .....                                    | 4  |
| 34 | Background and Rationale .....                         | 5  |
| 35 | Specific Aims.....                                     | 5  |
| 36 | <b>Primary Outcome</b> .....                           | 6  |
| 37 | <b>Secondary Outcomes</b> .....                        | 6  |
| 38 | <b>Exploratory Outcome</b> .....                       | 6  |
| 39 | <b>Screening/Baseline Phase</b> .....                  | 7  |
| 40 | <b>Pre-operative Phase</b> .....                       | 8  |
| 41 | <b>Intra-operative Phase</b> .....                     | 8  |
| 42 | <b>Intra-operative Monitoring</b> .....                | 10 |
| 43 | <b>Concurrent Medication</b> .....                     | 10 |
| 44 | <b>Assessment of Primary Efficacy Parameters</b> ..... | 11 |
| 45 | Epidural Study Solutions .....                         | 11 |
| 46 | <b>Post-operative Phase</b> .....                      | 11 |
| 47 | Inclusion Criteria .....                               | 11 |
| 48 | Exclusion Criteria.....                                | 12 |
| 49 | <b>Accrual Goal</b> .....                              | 12 |
| 50 | <b>Recruitment Plan</b> .....                          | 12 |
| 51 | <b>Risks and Benefits</b> .....                        | 12 |
| 52 | Benefits of DPE/ Epidural anesthesia .....             | 12 |
| 53 | Risks of Epidural/DPE anesthesia.....                  | 13 |
| 54 | Study Medication Risks .....                           | 13 |
| 55 | Risk Mitigation .....                                  | 14 |
| 56 | Drug Accountability and Subject Compliance.....        | 14 |
| 57 | Data Handling and Recordkeeping .....                  | 14 |

Title: Dural Puncture Epidural versus Epidural anesthesia for cesarean delivery: A randomized, double-blind study (#228768)  
PI: Nadir Sharawi, MD  
Site: University of Arkansas for Medical Sciences

|    |                                 |    |
|----|---------------------------------|----|
| 58 | Data Analysis .....             | 14 |
| 59 | Sample Size .....               | 15 |
| 60 | Randomization.....              | 15 |
| 61 | Withdrawal of Participants..... | 15 |
| 62 | Stopping the Study.....         | 15 |
| 63 | Ethical Considerations.....     | 16 |
| 64 | Dissemination of Data .....     | 16 |
| 65 | Appendices .....                | 18 |
| 66 |                                 |    |
| 67 |                                 |    |

Title: Dural Puncture Epidural versus Epidural anesthesia for cesarean delivery: A randomized, double-blind study (#228768)

PI: Nadir Sharawi, MD

Site: University of Arkansas for Medical Sciences

## 68 **Abbreviations**

|    |         |                                                     |
|----|---------|-----------------------------------------------------|
| 69 | ASA     | American Society of Anesthesiologist                |
| 70 | BP      | Blood Pressure                                      |
| 71 | CD      | Cesarean delivery                                   |
| 72 | CSE     | Combined spinal epidural                            |
| 73 | CSF     | Cerebro-Spinal Fluid                                |
| 74 | DPE     | Dural Puncture Epidural                             |
| 75 | ECG     | Electrocardiogram                                   |
| 76 | HIPAA   | Health Insurance Portability and Accountability Act |
| 77 | IRB     | Institutional Review Board                          |
| 78 | LA      | Local anesthetic                                    |
| 79 | L&D     | Labor and Delivery                                  |
| 80 | Mcg     | Microgram                                           |
| 81 | Min     | Minute                                              |
| 82 | ml, mls | Milliliter, Milliliters                             |
| 83 | PACU    | Post Anesthesia Care Unit                           |
| 84 | SOC     | Standard of care                                    |
| 85 | T5      | Thoracic Dermatome Level 5                          |
| 86 | T6      | Thoracic Dermatome Level 6                          |
| 87 | UAMS    | University of Arkansas for Medical Sciences         |
| 88 | VAS     | Visual Analogue Scale                               |
| 89 |         |                                                     |

Title: Dural Puncture Epidural versus Epidural anesthesia for cesarean delivery: A randomized, double-blind study (#228768)  
PI: Nadir Sharawi, MD  
Site: University of Arkansas for Medical Sciences

## 90 **Background and Rationale**

91 Cesarean delivery (CD) is the most commonly performed surgical procedure worldwide.  
92 Indications for CD include maternal or fetal distress, cervical arrest of dilation and  
93 elective CD. The rate of CD rose from 20.7% in 1996 to 32.9% in 2009 in US <sup>1</sup>. The rate  
94 of CD nationally currently is 32% of all births <sup>2</sup>. CD can be performed under neuraxial  
95 (epidural, spinal or combined spinal-epidural {CSE}) or general anesthesia. Based on  
96 expert consensus and clinical evidence, neuraxial anesthesia has been recommended  
97 over general anesthesia for by the American Society of Anesthesiologists and the  
98 Society for Obstetric Anesthesia and Perinatology <sup>3</sup>.

99  
100 Spinal anesthesia is limited by complications like toxicity of local anesthetic agents,  
101 transient neurologic back pain, post-dural puncture headache, nerve injury, caudal  
102 equina syndrome and spinal hematoma <sup>4</sup>. While epidural anesthesia is limited by slow  
103 onset of sensory block and difficulty with achieving bilateral analgesia that may require  
104 repeated adjustment of the epidural catheter <sup>5</sup>. Dural puncture epidural (DPE) is a  
105 newer technique increasingly used for labor analgesia to overcome these limitations. It  
106 involves the creation of a single dural perforation with a spinal needle, introduced  
107 through an epidural needle (similar to a CSE), but without the administration of  
108 medications through the spinal needle. This technique was developed to address the  
109 limitations of both epidural and spinal anesthesia when performed for the purpose of  
110 providing pain relief to laboring women.

111  
112 When compared to an epidural technique, DPE has been shown to decrease  
113 manipulation of the epidural catheter, provide a better and earlier onset of labor  
114 analgesia <sup>6,7,8</sup>, a lower incidence of failure <sup>9</sup>, improved bilateral block and a lower  
115 incidence of intra-op local anesthetic bolus requirement <sup>10</sup>. To date most of the studies  
116 have utilized DPE for the purposes of labor analgesia. Only one study has evaluated the  
117 use of DPE for surgical anesthesia for lower abdominal surgery <sup>11</sup>. The aim of this  
118 randomized double-blind study is to compare DPE with epidural anesthesia in the  
119 setting of elective CD.

## 120 **Specific Aims**

121 The aim of this study is to compare the onset time of anesthesia between standard  
122 epidural and DPE in elective cesarean delivery. We hypothesize that a DPE technique  
123 with a 25-gauge spinal needle will have a faster onset and improved quality of surgical  
124 anesthesia when compared to a standard epidural.

Title: Dural Puncture Epidural versus Epidural anesthesia for cesarean delivery: A randomized, double-blind study (#228768)

PI: Nadir Sharawi, MD

Site: University of Arkansas for Medical Sciences

125 **Primary Outcome**

126 The primary outcome will be the onset time of surgical anesthesia. This will be  
127 measured from the induction of anesthesia (as defined by the beginning of injection of  
128 the "Induction 1 syringe") to the point at which sharp sensation is lost bilaterally at the  
129 T6 dermatomal level (as measured by a blunt plastic neurotip® (Owen Mumford, USA)  
130 device).

131

132 **Secondary Outcomes**

133 1) "Inadequate Neuraxial Anesthesia":

134 This composite outcome (any or none) will defined as the failure to achieve at least a  
135 T10 bilateral sensory level pre-operatively (after 3 ml 1.5% lidocaine with 1:200,000  
136 epinephrine 45 mg lidocaine and up to 20 ml of 0.0625% bupivacaine), the  
137 requirement for intraoperative analgesia supplementation, conversion to general  
138 anesthesia or repeat neuraxial procedure, or failure to achieve the primary outcome  
139 within 15 minutes between the two groups.

140

141 2) We will compare the intraoperative supplementation rate between the two  
142 groups. This is defined as the percentage of women who require any additional  
143 medications to control pain during the elective CD in each arm of the trial.

144

145 **Exploratory Outcome**

146 The following will be abstracted from the medical records or reported by the patient in  
147 the perioperative period:

- 148 • Maximum pain Visual Analogue Scale (VAS) during surgery (as reported by patient,  
149 scored from 0-10 in the PACU).
- 150 • Incidence of side effects:
  - 151 ○ Nausea (self-reported by patient, yes or no).
  - 152 ○ Vomiting (observed yes or no).
  - 153 ○ Itching (self-reported by patient, yes or no).
- 154 • Use and dose of vasopressors (phenylephrine and ephedrine)
- 155 • Overall patient satisfaction score (asked and scored from 0-10).
- 156 • Neonatal Apgar scores (from medical records).
- 157 • Umbilical cord blood gases taken after delivery (arterial and or venous – from  
158 medical records).
- 159 • Opioid consumption over 24 hours postoperatively (from medical records)

160

161 **Flow Chart**

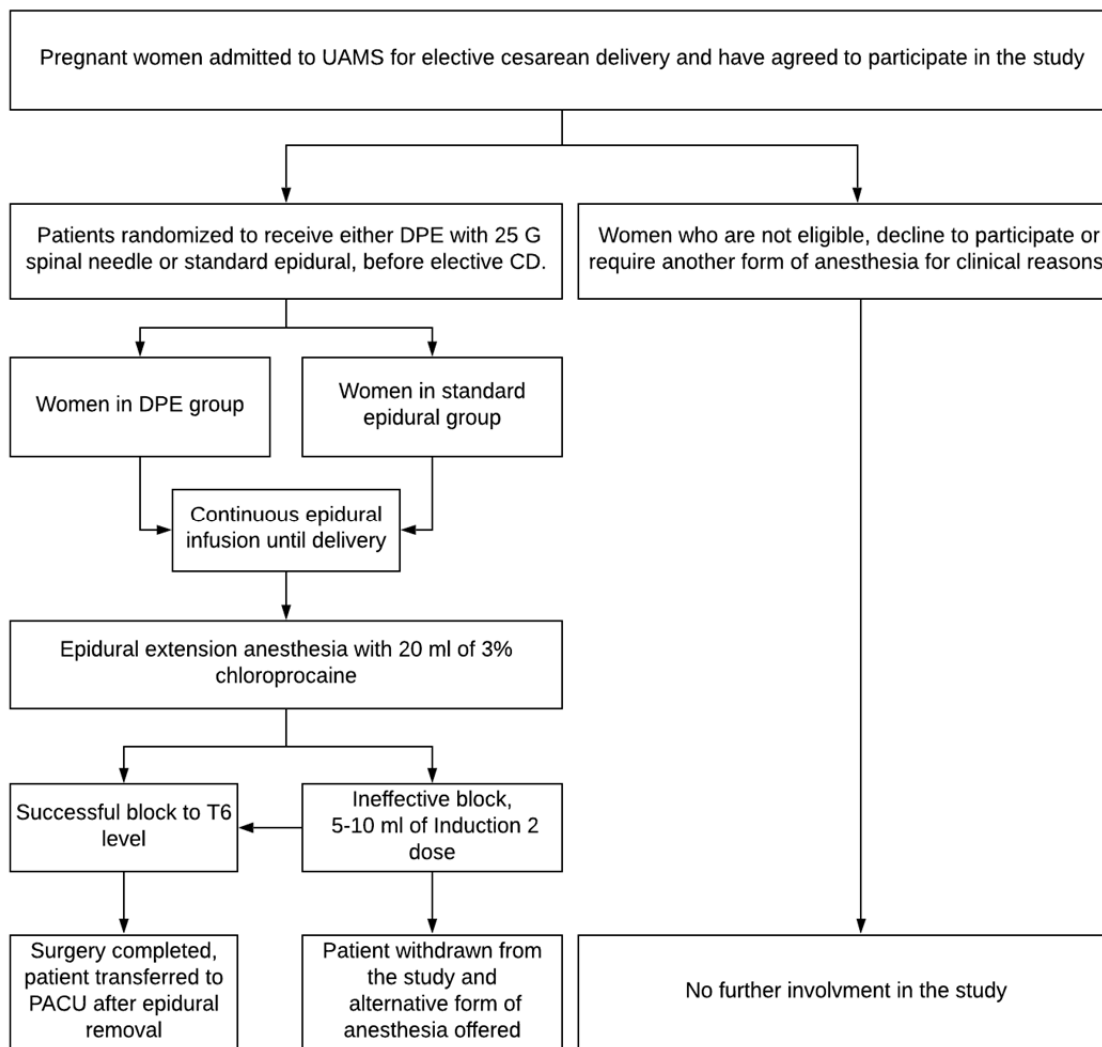

162  
163

164 **Study Design and Procedure**

165

166 **Screening/Baseline Phase**

167 The anesthesiologists performing the pre-operative evaluation (standard of care; SOC)  
168 will alert a member of the study team if the patient meets the inclusion criteria for the  
169 study. Following informed consent, we will obtain demographic and clinical information  
170 including, but not limited to, height, weight, age, current medications, medical  
171 diagnoses, and history of anesthesia complications (all SOC). Standard non-invasive

Title: Dural Puncture Epidural versus Epidural anesthesia for cesarean delivery: A randomized, double-blind study (#228768)  
PI: Nadir Sharawi, MD  
Site: University of Arkansas for Medical Sciences

172 vital signs (heart rate, blood pressure, respiratory rate, and temperature) will be  
173 obtained from the pre-operative work up.

174

### 175 **Pre-operative Phase**

176 Patients who have been enrolled into the study will be randomized to receive either  
177 DPE or standard epidural. As is standard practice, the informed consent process will be  
178 undertaken before any mood alerting medications are administered. This procedure will  
179 be performed in the patient's room upon admission to the Labor & Delivery Suite (L&D)  
180 shortly before (usually 1 hour) their scheduled time for cesarean section. Epidural/ DPE  
181 will be performed by an un-blinded anesthesiologist. The un-blinded anesthesiologist  
182 will have no other role in the patient's care other than performing the procedure. After  
183 insertion of the epidural or DPE, a low dose local anesthetic infusion will be infused into  
184 the epidural catheter up until the time of surgery (bupivacaine 0.0625% with 2 mcg/ml  
185 fentanyl; SOC). We have previously performed a similar study (IRB # 207313) with  
186 great success. Participant would then move on to the next phase of the study (see  
187 below). Patients who are not enrolled in the study would normally receive either an  
188 epidural or DPE in the same manner. The choice of anesthetic technique for the non-  
189 study patients is dependent on the preference of the anesthesiologist and clinical  
190 context.

191

### 192 **Epidural or DPE study group**

193 Participants will be blinded to which group they are being assigned. Participants are  
194 unable to see the procedure (due to placement in the lower back). Both procedures are  
195 almost identical except for a minor variation in technique. As such the time taken and  
196 "feel" of the procedure are identical. The unblinded anesthesiologist will insert the  
197 epidural or DPE based on randomization. They will have no further role in the study  
198 after the procedure. Insertion of the epidural or DPE will follow the standard practices in  
199 which all epidurals/DPE are inserted.

200

### 201 **Intra-operative Phase**

202 The patient will be transferred from her room to the operating room at the time of  
203 scheduled surgery. The epidural pump will be discontinued, and anesthesia care will be  
204 conducted in the same manner as all cesarean deliveries under epidural extension  
205 anesthesia (this refers to the process of providing anesthesia using a pre-existing  
206 epidural/DPE). Anesthesia will be induced in the standard manner. Motor and sensory  
207 block will be tested at the end of the epidural loading dose. Loss of sharp sensation will  
208 be measured using a blunt plastic neurotip® (Owen Mumford, USA) until the sensation  
209 of "sharpness" at the T5 dermatomal level has been reached. The neurotip is a  
210 noninvasive medical device that we use routinely to assess the level of anesthesia for



Title: Dural Puncture Epidural versus Epidural anesthesia for cesarean delivery: A randomized, double-blind study (#228768)  
PI: Nadir Sharawi, MD  
Site: University of Arkansas for Medical Sciences

211 CD. The T6 level measured at the xiphoid process (which is an easily palatable bony  
212 landmark) will be marked bilaterally with a washable marker pen to guide assessment of  
213 the primary end point. Sensory testing will be performed from caudad to cephalad (i.e.  
214 from blocked to unblocked dermatomes) to identify the first unblocked dermatome.  
215 To identify the level where the sensation of sharp is first appreciated, the investigator  
216 will ask the question: "Tell me when you feel the sensation of something sharp touching  
217 your skin." Both the motor and sensory block evaluations are part of the standard  
218 clinical care of patients receiving neuraxial anesthesia. The main difference for  
219 participants enrolled in the study is that the frequency of sensory assessments will be  
220 increased so that the onset of surgical anesthesia can be accurately documented  
221 (approximately every minute and then more frequently as the sensory block approaches  
222 the primary end point).

223 The local anesthetic solution will be given in three phases (SOC for epidural/DPE  
224 extension anesthesia):

- 225 1. Test dose – to check for correct placement of epidural
- 226 2. Induction dose 1 – to induce anesthesia
- 227 3. Induction dose 2 – further dose of local anesthesia if required (as per instructions  
228 below)

229 A second anesthesiologist, blind to the type of block will manage the clinical care of the  
230 patient from the beginning of the study (after epidural catheter placement) and will  
231 administer the induction drug (prepared by that anesthesiologist as per SOC). There will  
232 be no difference in this clinician's care of the subject than if she were not enrolled in the  
233 study. They will assess the onset of anesthesia and manage all aspects of the subject's  
234 clinical care including the documentation of the local anesthetic (LA) solution  
235 administration timing and its clinical effects. The speed of onset will be assessed from  
236 the end of epidural test dose. This will be defined as time zero and the start of  
237 anesthesia. The primary outcome will be the time taken to lose sharp sensation from a  
238 neurotip/pen device at the thoracic dermatome level 6 (T6). See below for a description  
239 of this assessment.

240 The primary outcome will be documented on a separate data collection tool (which the  
241 un-blinded anesthesiologist will not have access to). If required, intra-operative  
242 analgesia will be offered in the form of further epidural top-up, intravenous fentanyl,  
243 ketamine, nitrous oxide or replacement of neuraxial anesthesia/conversion into general  
244 anesthesia at the Standard of care (SOC). These are all commonly used medications  
245 that provide pain relief during cesarean sections in the event of breakthrough pain. The  
246 choice of which drug to use is at the discretion of the anesthesiologist. This information  
247 will be abstracted from medical records. In the event of an emergency situation blinding

Title: Dural Puncture Epidural versus Epidural anesthesia for cesarean delivery: A randomized, double-blind study (#228768)  
PI: Nadir Sharawi, MD  
Site: University of Arkansas for Medical Sciences

248 would be broken and the treating anesthesiologist would be informed to what group the  
249 patient belongs.

250

#### 251 Local anesthetic solution for anesthesia

252 Below is the description of the SOC preparation & administration of local anesthetic and  
253 conduct within the operating room for epidural extension anesthesia in parturients that  
254 require CD. 20 ml of 3% chloroprocaine which will be drawn up into a 20 ml syringe  
255 At the start of epidural extension anesthesia, a 5 ml test dose will be administered  
256 through the epidural (as previously described above). After three minutes, if there are  
257 no signs of accidental spinal block or intravascular administration then the remaining 15  
258 ml of the Local Anesthetic solution will be administered.

259

260 A further 5 ml of chloroprocaine will be administered if Induction dose 1 is not effective  
261 in providing sufficient anesthesia (reaching primary end point) after 10 minutes. This is  
262 referred to as Induction dose 2. If the primary end point is not reached at the 15-minute  
263 mark (total elapsed time after giving Induction dose 1) then a final 5 ml of  
264 chloroprocaine can be given. If the primary end point is not reached within 20 minutes  
265 the subject will be withdrawn from the study and the anesthesiologist can induce  
266 anesthesia in whichever way they think is best. At this point the anesthesiologist will  
267 break blinding. Therefore, the total volume of local anesthesia that can be given to the  
268 patient at this stage is 30 ml (20 ml from Induction dose 1 and up to 10 ml from  
269 Induction dose 2 if necessary).

270

271 This above is our usual practice except for the following:

- 272 • We are being very precise in regard to documentation of timing (primary end  
273 point of study)
- 274 • Monitoring the sensory block more frequently
- 275 • Blinding and randomization as part of a clinical trial

276

#### 277 Intra-operative Monitoring

278 As with all cesarean sections, full monitoring in the operating room will be applied and  
279 will be the same whether the participant is in the study or not.

280

#### 281 Concurrent Medication

282 Subjects enrolled in the study will be treated as per normal practice for elective  
283 cesarean section. If a general anesthetic must be instituted, the subject's participation in  
284 the study will be stopped.

285

Title: Dural Puncture Epidural versus Epidural anesthesia for cesarean delivery: A randomized, double-blind study (#228768)  
PI: Nadir Sharawi, MD  
Site: University of Arkansas for Medical Sciences

## 286 **Assessment of Primary Efficacy Parameters**

287 Assessment will be made of the sensory level after the epidural induction dose. This will  
288 give an indication of the suitability of surgical anesthesia before proceeding with  
289 cesarean section. This will be assessed by the blinded clinical anesthesiologist with a  
290 Neurotip™ device, 2 minutes after the completion of the epidural top-up and then  
291 continuously if possible or at intervals of approximately 1 minute until a T6 level to sharp  
292 sensation is achieved. Motor function will be assessed using the Modified Bromage  
293 Score.

## 294 **Epidural Study Solutions**

295 The solutions and their administration procedures are identical to those used outside  
296 this research and are almost exclusively used for epidural extension anesthesia for non-  
297 scheduled cesarean delivery. All patients enrolled will receive the same study solution  
298 exactly prescribed as above which is our routine practice.  
299

## 300 **Post-operative Phase**

301 Participants will be admitted to the PACU after completion of the operation. Care will be  
302 as per the SOC for all elective cesarean deliveries. Pain scores and cumulative opioid  
303 usage over the first 24 hours postoperatively, will be abstracted from the medical  
304 records of these subjects after discharge.

305 Before discharge from the PACU, the un-blinded anesthesiologist would access the  
306 patient's medical record and replace the charted "study group" with the either standard  
307 Epidural or DPE administered before closing the anesthetic record.  
308

## 309 **Study Population**

310 All subjects scheduled for elective cesarean delivery will be screened for recruitment  
311 when admitted to UAMS labor and delivery unit. A member of the research team will  
312 approach the subject after completion of the anesthetic pre-assessment which is a  
313 standard of care.  
314

## 315 **Inclusion Criteria**

316 Any patient requiring an elective cesarean section at UAMS labor and delivery unit who  
317 is:

- 318 ● ≥ 18 years of age for the mother
- 319 ● Singleton pregnancy
- 320 ● Gestation > 36 weeks
- 321 ● ASA class II and III
- 322 ● Provides written consent

Title: Dural Puncture Epidural versus Epidural anesthesia for cesarean delivery: A randomized, double-blind study (#228768)  
PI: Nadir Sharawi, MD  
Site: University of Arkansas for Medical Sciences

- 323 • Infant of mother
- 324 • Elective or non-urgent cesarean delivery

325

### 326 Exclusion Criteria

- 327 • Patient refusal
- 328 • Urgent/emergent cesarean sections
- 329 • ASA class IV or above
- 330 • Unable to understand English
- 331 • Significant back surgery or scoliosis
- 332 • Lethal fetal abnormality or likely to affect APGAR scores
- 333 • Weight > 120 kg
- 334 • Height < 150 cm
- 335 • Allergy to study solutions

### 336 **Accrual Goal**

337 A total of 140 mother-infant dyads (a total of 280 subjects) requiring an elective  
338 cesarean section at UAMS labor and delivery unit will be enrolled into the study.  
339

### 340 **Recruitment Plan**

341 Potential subjects will be offered participation in the study after admission into the Labor  
342 and Delivery unit. All potential subjects will be informed of the study by a member of the  
343 study team after the anesthetic pre-operative consultation. The informed consent  
344 /HIPAA discussion will take place prior to any pre-operative medications being  
345 administered and the potential subject will be allowed as much time as necessary to  
346 consider participating in the study.

347

### 348 **Risks and Benefits**

349 The benefits and risks to the study participants overall will be the same as all patients  
350 presenting to L&D for elective cesarean delivery. That is, whether a patient decides to  
351 participate or not in the study, the normal standard of care is neuraxial anesthesia for  
352 CD as opposed to general anesthesia. The spinal, epidural and DPE are all commonly  
353 used in our unit to provide anesthesia for CD. The choice of anesthetic technique  
354 depends on the anesthesiologist's discretion.

355

### 356 Benefits of DPE/ Epidural anesthesia

357 These techniques will be considered together as they are similar. The main advantage  
358 of epidural/DPE anesthesia is the ability to extend anesthesia for as long as required.  
359 This also allows the administration of further local anesthetic solution through the

Title: Dural Puncture Epidural versus Epidural anesthesia for cesarean delivery: A randomized, double-blind study (#228768)  
PI: Nadir Sharawi, MD  
Site: University of Arkansas for Medical Sciences

360 epidural if surgery is prolonged or to treat any episodes of intraoperative pain without  
361 having to convert to general anesthesia.

362

### 363 Risks of Epidural/DPE anesthesia

364 Risks to participants in this study due to epidural/DPE anesthesia is: Inadvertent  
365 intravascular injection or high epidural. This risk can be minimized by aspirating blood  
366 through the epidural catheter and administering a 'test dose' to rule out intravascular  
367 injection or accidental spinal administration that may lead to a high block. The above  
368 interventions are usually enough to minimize the risk of any hazards of intravascular  
369 injection or inadvertent spinal that may lead to a high block.

370

### 371 Disadvantages of participating in the study

372 Research related risk to study participants include the potential for loss of  
373 confidentiality. Measures to protect the confidentiality of study participants will be  
374 implemented as described in the Data Handling and Recordkeeping section below.  
375 There will be no direct benefits to the study participants; however, knowledge gained  
376 from the study could potentially benefit patients in the future.

377

### 378 Study Medication Risks

379

#### 380 **Severe allergic reactions (rare)**

- 381 • Swelling of the face, lips, tongue or throat. This may make it difficult to swallow  
382 and breath.
- 383 • Severe itching of the skin (with raised lumps).
- 384 • Nerve damage that may cause changes in sensation or muscle weakness  
385 (neuropathy).
- 386 • Slowed or stopped breathing or stopped heartbeat.
- 387 • Total spinal block
- 388 • Uneven heart beat (arrhythmias).

389

#### 390 **Common**

- 391 • Low blood pressure (causing dizziness or light-headedness).
- 392 • Feeling sick (nausea) or being sick (vomiting).
- 393 • Pins and needles.

394

395

396

Title: Dural Puncture Epidural versus Epidural anesthesia for cesarean delivery: A randomized, double-blind study (#228768)  
PI: Nadir Sharawi, MD  
Site: University of Arkansas for Medical Sciences

397 **Uncommon**

- 398 • Ringing in the ears (tinnitus) or being sensitive to sound.  
399 • Numbness of the tongue or around the mouth.  
400 • Feeling sleepy.  
401 • Shivering.

402

403 **Risk Mitigation**

404 These risks can occur in any patient undergoing the procedure under anesthesia and  
405 are not study specific. All subjects will be observed in a unit accustomed to treating  
406 patients recovering from surgery and anesthesia. Customary clinical care will be  
407 provided by the patient's treating physician. No standard treatments will be withheld as  
408 a result of participation in the study.

409 **Drug Accountability and Subject Compliance**

410 This study will take place within the UAMS hospital's labor and delivery unit. There will  
411 be full drug accountability throughout the study. There will be an accountability log,  
412 labels for each ampoule marked especially for the study (DPE/Epidural Study). The  
413 procedure will be performed by an un-blinded anesthesiologist and the assessments  
414 and conduct of surgery will be performed by another anesthesiologist who remains  
415 blinded to the patient allocation group. The procedure (DPE or epidural) will be  
416 documented within the anesthetic record by the unblinded anesthesiologists.  
417 Compliance will be confirmed by comparing the medical chart to the accountability  
418 logbook.

419 **Data Handling and Recordkeeping**

420 The Principal Investigator will carefully monitor study procedures to protect the safety of  
421 research subjects, the quality of the data and the integrity of the study. All study subject  
422 material will be assigned a unique identifying code or number. The key to the code will  
423 be kept in a locked file cabinet and password protected Principal Investigator's  
424 computer in the Principal Investigator's office. Only Nadir Sharawi, MD will have access  
425 to the code and information that identifies the subject in this study. At the conclusion of  
426 the study, the data will be permanently deidentified. Deidentified study data will be  
427 maintained and ultimately destroyed per UAMS policy.

428 **Data Analysis**

429 The alternative hypothesis is that DPE group will have a faster onset time to achieve  
430 loss of sharp sensation at the T6 dermatome compared to the epidural group.

Title: Dural Puncture Epidural versus Epidural anesthesia for cesarean delivery: A randomized, double-blind study (#228768)  
PI: Nadir Sharawi, MD  
Site: University of Arkansas for Medical Sciences

431 For statistical analysis, the Student's t- test will be used for continuous normally  
432 distributed variables and the Mann-Whitney test for nonparametric variables. Linear  
433 regression analysis will be used to assess any relationship between the pre epidural  
434 extension parameters and the subsequent speed of onset of the block.

435

#### 436 Sample Size

437 The sample size will be calculated for continuous outcome date for a superiority study.  
438 We have assumed that an onset time difference of two minutes is the smallest  
439 difference that is clinically acceptable, so that a difference of more than two minutes  
440 would matter in clinical practice. Approximately 120 mother-infant dyads are required to  
441 have a 90% chance of detecting, as significant at the 5% level, an increase in the  
442 primary outcome measure from 10 minutes in the DPE group to 12 minutes in the  
443 epidural group, assuming a standard deviation of 3 minutes. Therefore 60 mother –  
444 infant dyads will be recruited to each arm. Statistical significance will be taken as  $P <$   
445  $0.05$ . In total, 140 mother – infant dyads will be recruited to account for any withdrawals  
446 or protocol violations.

447

448

#### 449 Randomization

450 70 pieces of paper will be printed for each group containing (DPE or epidural groups) for  
451 a total of 140. Each of the individual pieces of paper will then be placed in a sealed  
452 envelope. All envelopes will be shuffled and then numbered 1 – 140.

453 Patients will be assigned a number 1 – 140 as they are enrolled in the study. The  
454 envelope will be obtained and opened by an un-blinded anesthesiologist revealing their  
455 randomization group. The un-blinded Anesthesiologist will not be involved in the  
456 patient's care or data collection. They will insert the epidural or DPE accordingly. They  
457 will not be aware of primary outcome result as this will be documented on a separate  
458 data collection form. All members of the patient's care team are blinded to the  
459 assignment study drug. The un-blinded anesthesiologist will inform the clinical team  
460 which procedure was undertaken if determined to be clinically necessary.

#### 461 **Withdrawal of Participants**

462 Subjects will have the right to withdraw from the study at any point in time and have the  
463 right to withdraw any accompanying data. The study has been powered to account for  
464 approximately a 15% withdrawal / procedure failure rate.

#### 465 **Stopping the Study**

466 Subject participation in the study will be stopped if either of the following occurs:



Title: Dural Puncture Epidural versus Epidural anesthesia for cesarean delivery: A randomized, double-blind study (#228768)  
PI: Nadir Sharawi, MD  
Site: University of Arkansas for Medical Sciences

- 467 • the subject did not achieve sharp sensation lost bilaterally at the T6 dermatomal  
468 level (as measured by a blunt plastic neurotip® (Owen Mumford, USA) device)  
469 after 18 minutes from administration of 3 ml test dose;
- 470 • the subject experiences significant pain that is not relieved by the intraoperative  
471 analgesic supplementation described above;
- 472 • if general anesthesia must be instituted to the subject.

### 473 **Ethical Considerations**

474 This study will be conducted in accordance with all applicable government regulations  
475 and University of Arkansas for Medical Sciences research policies and  
476 procedures. This protocol and any amendments will be submitted and approved by the  
477 UAMS Institutional Review Board (IRB) to conduct the study.

478 The formal consent of each subject, using the IRB-approved consent/HIPAA form, will  
479 be obtained before that subject is submitted to any study procedure. All subjects for this  
480 study will be provided a consent/HIPAA form describing this study and providing  
481 sufficient information in language suitable for subjects to make an informed decision  
482 about their participation in this study. The person obtaining consent will thoroughly  
483 explain each element of the document and outline the risks and benefits, alternate  
484 treatment(s), and requirements of the study. The consent process will take place in a  
485 quiet and private room, and subjects may take as much time as needed to make a  
486 decision about their participation. Participation privacy will be maintained and questions  
487 regarding participation will be answered. No coercion or undue influence will be used  
488 in the consent process. This consent/HIPAA form must be signed by the subject and  
489 the individual obtaining the consent. A copy of the signed consent/HIPAA will be given  
490 to the participant, and the informed consent process will be documented in each  
491 subject's research record.

### 492 **Dissemination of Data**

493 Results of this study may be used for presentations, posters, or publications. The  
494 publications will not contain any identifiable information that could be linked to a  
495 participant.

496



Title: Dural Puncture Epidural versus Epidural anesthesia for cesarean delivery: A randomized, double-blind study (#228768)  
PI: Nadir Sharawi, MD  
Site: University of Arkansas for Medical Sciences

497 **References**

498

- 499 1. Martin, J.A., et al., *Births: final data for 2012*. Natl Vital Stat Rep, 2013. **62**(9): p.  
500 1-68.
- 501 2. Martin, J.A., B.E. Hamilton, and M.J. Osterman, *Births in the United States, 2015*.  
502 NCHS Data Brief, 2016(258): p. 1-8.
- 503 3. *Practice Guidelines for Obstetric Anesthesia: An Updated Report by the*  
504 *American Society of Anesthesiologists Task Force on Obstetric Anesthesia and*  
505 *the Society for Obstetric Anesthesia and Perinatology*. Anesthesiology, 2016.  
506 **124**(2): p. 270-300.
- 507 4. Liu, S.S. and S.B. McDonald, *Current issues in spinal anesthesia*.  
508 Anesthesiology, 2001. **94**(5): p. 888-906.
- 509 5. Bauer, M., et al., *Recent advances in epidural analgesia*. Anesthesiol Res Pract,  
510 2012. **2012**: p. 309219.
- 511 6. Wilson, S.H., et al., *Labor Analgesia Onset With Dural Puncture Epidural Versus*  
512 *Traditional Epidural Using a 26-Gauge Whitacre Needle and 0.125%*  
513 *Bupivacaine Bolus: A Randomized Clinical Trial*. Anesth Analg, 2018. **126**(2): p.  
514 545-551.
- 515 7. Yadav, P., et al., *Comparison of Dural Puncture Epidural Technique versus*  
516 *Conventional Epidural Technique for Labor Analgesia in Primigravida*. Journal of  
517 Obstetric Anaesthesia and Critical Care, 2018. **8**(1): p. 24-28.
- 518 8. Cappiello, E., et al., *A randomized trial of dural puncture epidural technique*  
519 *compared with the standard epidural technique for labor analgesia*. Anesth  
520 Analg, 2008. **107**(5): p. 1646-51.
- 521 9. Gupta, D., A. Srirajakalidindi, and V. Soskin, *Dural puncture epidural analgesia is*  
522 *not superior to continuous labor epidural analgesia*. Middle East J Anaesthesiol,  
523 2013. **22**(3): p. 309-16.
- 524 10. Chau, A., et al., *Dural Puncture Epidural Technique Improves Labor Analgesia*  
525 *Quality With Fewer Side Effects Compared With Epidural and Combined Spinal*  
526 *Epidural Techniques: A Randomized Clinical Trial*. Anesth Analg, 2017. **124**(2):  
527 p. 560-569.
- 528 11. Suzuki, N., et al., *Dural puncture with a 26-gauge spinal needle affects spread of*  
529 *epidural anesthesia*. Anesth Analg, 1996. **82**(5): p. 1040-2.

530

531

Title: Dural Puncture Epidural versus Epidural anesthesia for cesarean delivery: A randomized, double-blind study (#228768)  
PI: Nadir Sharawi, MD  
Site: University of Arkansas for Medical Sciences

532 **Appendices**

- 533 1. Bromage Score  
534 2. Neonatal Apgar Score  
535 3. Pain Visual Analogue Scale (VAS)

536  
537  
538  
539  
540  
541  
542  
543  
544  
545  
546  
547  
548  
549  
550  
551  
552  
553  
554  
555  
556  
557  
558  
559  
560  
561  
562  
563  
564  
565  
566  
567  
568  
569  
570

Title: Dural Puncture Epidural versus Epidural anesthesia for cesarean delivery: A randomized, double-blind study (#228768)  
PI: Nadir Sharawi, MD  
Site: University of Arkansas for Medical Sciences

571

572 **Appendix 1**

573 **Description of the Bromage score**

574 Grade 1 No motor block

575 Grade 2 Inability to raise extended leg, able to move knees and feet

576 Grade 3 Inability to raise extended leg and move knee, able to move feet

577 Grade 4 Complete motor block of the lower limbs.

578

579

580

581

582

583

584

585

586

587

588

589

590

591

592

593

594

595

596

597

598

599

600

601

602

603

604

605

606

Title: Dural Puncture Epidural versus Epidural anesthesia for cesarean delivery: A randomized, double-blind study (#228768)

PI: Nadir Sharawi, MD

Site: University of Arkansas for Medical Sciences

607 **Appendix 2**  
608 **Neonatal Apgar Score**

|                                        | Score of 0                    | Score of 1                                         | Score of 2                                       | Component of backronym |
|----------------------------------------|-------------------------------|----------------------------------------------------|--------------------------------------------------|------------------------|
| <b>Skin color</b>                      | blue or pale all over         | blue at extremities<br>body pink<br>(acrocyanosis) | no cyanosis<br>body and<br>extremities pink      | <b>A</b> ppearance     |
| <b>Pulse rate</b>                      | absent                        | < 100 beats per<br>minute                          | > 100 beats per<br>minute                        | <b>P</b> ulse          |
| <b>Reflex irritability<br/>grimace</b> | no response<br>to stimulation | grimace on suction or<br>aggressive<br>stimulation | cry on stimulation                               | <b>G</b> rimace        |
| <b>Activity</b>                        | none                          | some flexion                                       | flexed arms and<br>legs that resist<br>extension | <b>A</b> ctivity       |
| <b>Respiratory effort</b>              | absent                        | weak, irregular,<br>gaspings                       | strong, robust cry                               | <b>R</b> espiration    |

609  
610  
611  
612  
613  
614  
615  
616  
617  
618  
619  
620  
621  
622

Title: Dural Puncture Epidural versus Epidural anesthesia for cesarean delivery: A randomized, double-blind study (#228768)

PI: Nadir Sharawi, MD

Site: University of Arkansas for Medical Sciences

623 Appendix 3

624 **Pain Visual Analogue Scale**

625

626

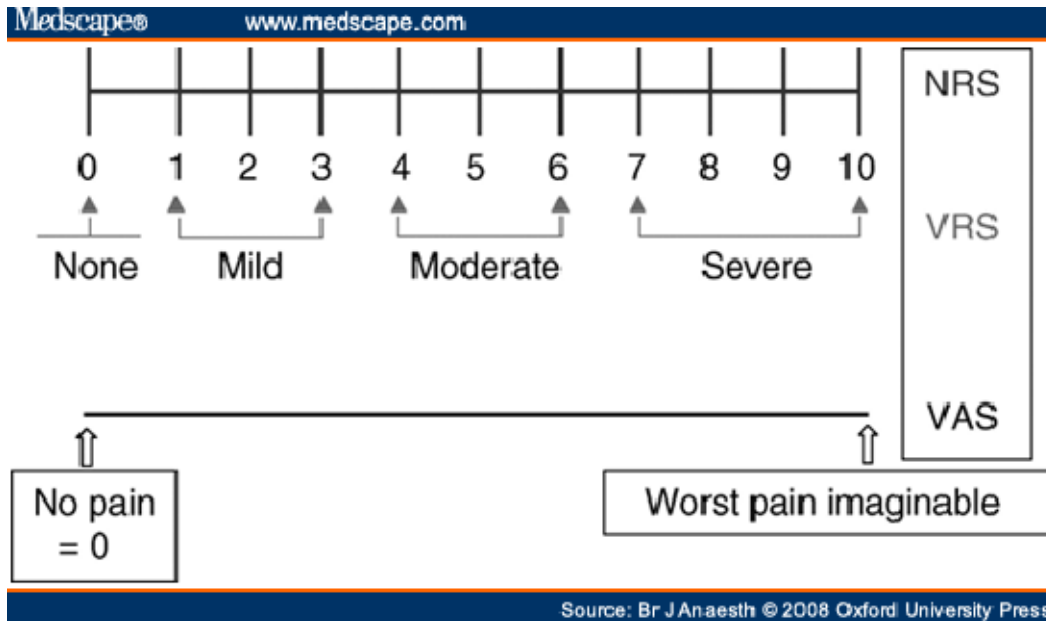

627

628

629

630

631

632

633

634

635

636

637

638

639

640

641

642

643

644

645
