# Supplementary material for: Effect of Dural-Puncture Epidural vs Standard Epidural for Epidural Extension on Onset Time of Surgical Anesthesia in Elective Cesarean Delivery: A Randomized Clinical Trial
Source: PubMed Central journal article supplement (PMC10394571; doi:10.1001/jamanetworkopen.2023.26710), 2023-08-01
Supplement: jamanetwopen-e2326710-s002.pdf [file jamanetwopen-e2326710-s002.pdf]

## Data Sharing Statement

Sharawi. Effect of Dural-Puncture Epidural vs Standard Epidural for Epidural Extension on Onset Time of Surgical Anesthesia in Elective Cesarean Delivery. *JAMA Netw Open*. Published August 01, 2023. doi:10.1001/jamanetworkopen.2023.26710

### Data

**Data available:** No
